# Supplementary material
Source: HighWire-hosted journal article supplement (doi:10.1101/rna.080883.125)
Supplement: Supplemental_Table_S1.xlsx [file Supplemental_Table_S1.xlsx]

## Sheet: Figure 1
Normalized P-eIF2		Arsenite concentration
	0	25	100	250
Rep 1	1	11.0616	17.0431	19.6238
Rep 2	0.999979	9.25269	18.6083	14.0452
Rep 3	0.999997	7.98273	20.1911	22.8207
Normalized P-eIF2		Thapsigargin concentration
	0	0.04	0.2	1
Rep 1	0.999999	6.91629	8.787	9.98762
Rep 2	0.999955	4.30293	9.97768	9.17259
Rep 3	0.999999	6.06247	7.12002	11.7612
BONCAT				HF concentration
	DMSO	As	0.02	0.2	2	20
Rep 1	1	0.09	0.51	0.16	0.03	0.18
Rep 2	1	0.2	0.81	0.36	0.22	0.18
Rep 3	1	0.08	0.93	0.22	0.13	0.11
Normalized P-eIF2				HF concentration
	DMSO	As	0.02	0.2	2	20
Rep 1	1	12.97	1.41	2.61	4.63	9.57
Rep 2	1	15.39	0.48	1.92	5.32	6.95
Rep 3	1	11.99	0.98	2.06	5.38	10.72
Normalized P-eIF2			Borr concentration
	0	1	5	25	125
Rep 1	1.00001	2.94067	2.98535	5.5869	6.64253
Rep 2	1	2.17956	2.5466	5.49525	9.00568
Rep 3	1.00031	2.4795	2.68782	3.59119	7.41499

## Sheet: Figure 2
		Arsenite treatment							Thapsigargin treatment					Halofuginone treatments						Borrelidin treatments						Emetine treatments
	Frame #	Treatment	# Cells	# w/ SGs	% w/ SGs			Frame #	Treatment	# Cells	# w/ SGs	% w/ SGs		Rep 1
Replicate 1	1	-	67	0			Replicate 1	1	DMSO	48	0			0.02 uM	Frame #	Total cells	Cells w/ SGs	% in SGS		Rep 1						Date	Treatment	Frame	Cells	w/ SGs	%
	2		51	0	0			2		64	0	0		Frame 1	1	56	4			1	Image #	Total cells	Cells w/ SGs	% in SGs			0.018	1	62	9	14.5
	3	+Puro	86	0				3	+Puro	79	0			Frame 2	2	43	0	4.0404		Frame 1	1	27	0				0.018	2	66	12	18.2
	4		64	1	0.666667			4		68	1	0.680272								Frame 2	2	74	3	2.9703			0.18	3	59	10	16.9
	5	25 As	95	62				5	0.04 Tg	69	27			0.02 + Puro	Frame #	Total cells	Cells w/ SGs	% in SGS									0.18	4	61	11	18
	6		75	52	67.0588			6		69	18	32.6087		Frame 1	4	44	3			1 + Puro	Image #	Total cells	Cells w/ SGs	% in SGs			1.8	5	65	3	4.6
	7	25 + Puro	68	62				7	0.04 Puro	64	56			Frame 2	5	61	3	5.71429		Frame 1	4	43	9				1.8	6	62	0	0
	8		78	76	94.5205			8		68	57	85.6061								Frame 2	5	57	13	22			18	7	54	0	0
	13	100 As	71	71				9	0.2 Tg	62	53			0.2	Frame #	Total cells	Cells w/ SGs	% in SGS									18	8	58	0	0
	14		90	90	100			10		76	63	84.058		Frame 1	7	65	28			5	Image #	Total cells	Cells w/ SGs	% in SGs		Date	Treatment	Frame	Cells	w/ SGs	%
	15	100 + Puro	72	72				11	0.2 puro	75	58			Frame 2	8	52	22	42.735		Frame 1	7	68	26				0.018	1	62	3	4.8
	16		73	72	99.3103			12		61	60	86.7647								Frame 2	8	73	29	39.0071			0.018	2	70	3	4.3
	17	250 As	66	64				13	1 Tg	55	46			0.2 + Puro	Frame #	Total cells	Cells w/ SGs	% in SGS									0.18	3	64	15	23.4
	18		64	64	98.4615			14		83	77	89.1304		Frame 1	10	35	29			5 + Puro	Image #	Total cells	Cells w/ SGs	% in SGs			0.18	4	60	20	33.3
	19	250 + Puro	69	68				15	1 + Puro	60	58			Frame 2	11	55	28	63.3333		Frame 1	10	44	40				1.8	5	47	1	2.1
	20		72	72	99.2908			16		65	62	96								Frame 2	11	58	50	88.2353			1.8	6	58	2	3.4
Replicate 2	1	-	65	0			Replicate 2	1	DMSO	58	0			2 uM	Frame #	Total cells	Cells w/ SGs	% in SGS									18	7	63	0	0
	2		60	0	0			2		52	0	0		Frame 1	13	27	19			25	Image #	Total cells	Cells w/ SGs	% in SGs			18	8	56	1	1.8
	3	+Puro	71	0				3	+Puro	74	0			Frame 2	14	40	31	74.6269		Frame 1	13	40	15			Date	Treatment	Frame	Cells	w/ SGs	%
	4		77	0	0			4		65	0	0								Frame 2	14	60	32	47			0.018	1	64	3	4.7
	5	25 As	72	52				5	0.04 Tg	58	21			2 + Puro	Frame #	Total cells	Cells w/ SGs	% in SGS									0.018	2	48	2	4.2
	6		57	43	73.6434			6		60	33	45.7627		Frame 1	16	62	58			25 + Puro	Image #	Total cells	Cells w/ SGs	% in SGs			0.18	3	52	14	26.9
	7	25 + Puro	75	73				7	0.04 Puro	66	43			Frame 2	17	44	40	92.4528		Frame 1	16	56	55				0.18	4	47	11	23.4
	8		63	58	94.9275			8		73	50	66.9065								Frame 2	17	64	60	95.8333			1.8	5	47	3	6.4
	9	100 As	69	69				9	0.2 Tg	69	54			20 uM	Frame #	Total cells	Cells w/ SGs	% in SGS									1.8	6	62	7	11.3
	10		56	56	100			10		68	53	78.1022		Frame 1	19	63	11			125	Image #	Total cells	Cells w/ SGs	% in SGs			18	7	55	0	0
	11	100 Puro	59	58				11	0.2 puro	72	61			Frame 2	20	59	7	14.7541		Frame 1	19	42	1				18	8	33	0	0
	12		64	64	99.187			12		62	54	85.8209								Frame 2	20	60	0	0.980392
	13	250 As	56	55				13	1 Tg	54	45			20+Puro	Frame #	Total cells	Cells w/ SGs	% in SGS
	14		51	51	99.0654			14		83	77	89.0511		Frame 1	22	34	32			125 + Puro	Image #	Total cells	Cells w/ SGs	% in SGs
	15	250 + Puro	48	47				15	1 + Puro	69	65			Frame 2	23	38	38	97.2222		Frame 1	22	54	54
	16		78	78	99.2063			16		68	63	93.4307								Frame 2	23	59	57	98.2301
Replicate 3	1	-	68	0			Replicate 3	1	DMSO	67	0
	2		75	0	0			2		65	0	0		Rep 2
	3	+Puro	70	0				3	+Puro	80	0			0.02 uM	Frame #	Total cells	Cells w/ SGs	% in SGS		Rep 2
	4		57	0	0			4		68	0	0		Frame 1	1	51	1			1	Image #	Total cells	Cells w/ SGs	% in SGs
	5	25 As	89	43				5	0.04 Tg	71	32			Frame 2	2	39	1	2.22222		Frame 1	1	61	6
	6		68	47	57.3248			6		88	51	52.2013								Frame 2	2	48	8	12.844
	7	25 + Puro	59	43				7	0.04 Puro	65	59			0.02 + Puro	Frame #	Total cells	Cells w/ SGs	% in SGS
	8		62	50	76.8595			8		78	75	93.7063		Frame 1	3	36	0			1 + Puro	Image #	Total cells	Cells w/ SGs	% in SGs
	9	100 As	66	66				9	0.2 Tg	88	80			Frame 2	4	34	2	2.85714		Frame 1	3	61	19
	10		64	64	100			10		62	57	91.3333								Frame 2	4	49	16	31.8182
	11	100 Puro	55	51				11	0.2 puro	92	88			0.2	Frame #	Total cells	Cells w/ SGs	% in SGS
	12		64	62	94.958			12		68	62	93.75		Frame 1	5	49	18			5	Image #	Total cells	Cells w/ SGs	% in SGs
	13	250 As	69	66				13	1 Tg	51	49			Frame 2	6	50	12	30.303		Frame 1	5	54	21
	14		78	78	97.9592			14		53	50	95.1923								Frame 2	6	40	13	36.1702
	15	250 + Puro	51	50				15	1 + Puro	76	75			0.2 + Puro	Frame #	Total cells	Cells w/ SGs	% in SGS
	16		42	42	98.9247			16		51	50	98.4252		Frame 1	7	39	18			5 + Puro	Image #	Total cells	Cells w/ SGs	% in SGs
														Frame 2	8	45	28	54.7619		Frame 1	7	55	50
																				Frame 2	8	55	42	83.6364
														2 uM	Frame #	Total cells	Cells w/ SGs	% in SGS
														Frame 1	9	50	32			25	Image #	Total cells	Cells w/ SGs	% in SGs
														Frame 2	10	52	35	65.6863		Frame 1	9	36	15
																				Frame 2	10	51	22	42.5287
														2 + Puro	Frame #	Total cells	Cells w/ SGs	% in SGS
														Frame 1	11	41	41			25 + Puro	Image #	Total cells	Cells w/ SGs	% in SGs
														Frame 2	12	39	36	96.25		Frame 1	11	44	44
																				Frame 2	12	48	47	98.913
														20 uM	Frame #	Total cells	Cells w/ SGs	% in SGS
														Frame 1	13	44	4			125	Image #	Total cells	Cells w/ SGs	% in SGs
														Frame 2	14	44	4	9.09091		Frame 1	13	46	0
																				Frame 2	14	40	0	0
														20+Puro	Frame #	Total cells	Cells w/ SGs	% in SGS
														Frame 1	15	56	55			125 + Puro	Image #	Total cells	Cells w/ SGs	% in SGs
														Frame 2	16	50	49	98.1132		Frame 1	15	43	36
																				Frame 2	16	40	32	81.9277
														Rep 3
														0.02 uM	Frame #	Total cells	Cells w/ SGs	% in SGS		Rep 3
														Frame 1	17	42	0			1	Image #	Total cells	Cells w/ SGs	% in SGs
														Frame 2	18	44	0	0		Frame 1	1	60	9
																				Frame 2	2	42	4	12.7451
														0.02 + Puro	Frame #	Total cells	Cells w/ SGs	% in SGS
														Frame 1	19	47	1			1 + Puro	Image #	Total cells	Cells w/ SGs	% in SGs
														Frame 2	20	47	4	5.31915		Frame 1	3	52	18
																				Frame 2	4	46	23	41.8367
														0.2	Frame #	Total cells	Cells w/ SGs	% in SGS
														Frame 1	21	55	14			5	Image #	Total cells	Cells w/ SGs	% in SGs
														Frame 2	22	44	17	31.3131		Frame 1	5	60	26
																				Frame 2	6	43	20	44.6602
														0.2 + Puro	Frame #	Total cells	Cells w/ SGs	% in SGS
														Frame 1	23	46	28			5 + Puro	Image #	Total cells	Cells w/ SGs	% in SGs
														Frame 2	24	50	26	56.25		Frame 1	7	60	56
																				Frame 2	8	43	37	90.2913
														2 uM	Frame #	Total cells	Cells w/ SGs	% in SGS
														Frame 1	25	37	23			25	Image #	Total cells	Cells w/ SGs	% in SGs
														Frame 2	26	38	19	56		Frame 1	9	46	14
																				Frame 2	10	41	19	37.931
														2 + Puro	Frame #	Total cells	Cells w/ SGs	% in SGS
														Frame 1	27	43	42			25 + Puro	Image #	Total cells	Cells w/ SGs	% in SGs
														Frame 2	28	57	54	96		Frame 1	11	37	37
																				Frame 2	12	59	57	97.9167
														20 uM	Frame #	Total cells	Cells w/ SGs	% in SGS
														Frame 1	29	52	6			125	Image #	Total cells	Cells w/ SGs	% in SGs
														Frame 2	30	47	6	12.1212		Frame 1	13	49	1
																				Frame 2	14	47	0	1.04167
														20+Puro	Frame #	Total cells	Cells w/ SGs	% in SGS
														Frame 1	31	26	25			125 + Puro	Image #	Total cells	Cells w/ SGs	% in SGs
														Frame 2	32	57	52	92.7711		Frame 1	15	31	30
																				Frame 2	16	53	49	94.0476

## Sheet: Figure 3A
	Rep 1	Relative P-eIF2
	Un	1
	HF	3.49604
	0.2	3.19103
Proline	1	2.3867
	5	1.28194
	Rep 2	Relative P-eIF2
	Un	1
	HF	4.41233
Proline	0.2	3.54568
	1	3.40792
	5	1.81373
	Rep 3	Relative P-eIF2
	Un	1
	HF	2.21769
Proline	0.2	3.09375
	1	1.65376
	5	0.786414

## Sheet: Figure 3B
Rep 1						Rep 2						Rep 3
0	Image #	Total cells	Cells w/ SGs	% in SGS		0	Image #	Total cells	Cells w/ SGs	% in SGS		0	Image #	Total cells	Cells w/ SGs	% in SGS
Frame 1	1	33	11			Frame 1	1	43	10			Frame 1	1	40	16
Frame 2	2	41	12			Frame 2	2	48	15			Frame 2	2	45	18
Frame 3	3	23	8	31.9588		Frame 3	3	45	18	31.6176		Frame 3	3	19	6	38.4615
5	Image #	Total cells	Cells w/ SGs	% in SGS		5	Image #	Total cells	Cells w/ SGs	% in SGS		5	Image #	Total cells	Cells w/ SGs	% in SGS
Frame 1	4	23	6			Frame 1	4	23	9			Frame 1	4	46	17
Frame 2	5	39	14			Frame 2	5	51	15			Frame 2	5	44	14
Frame 3	6	29	7	29.6703		Frame 3	6	38	19	38.3929		Frame 3	6	36	5	28.5714
15	Image #	Total cells	Cells w/ SGs	% in SGS		15	Image #	Total cells	Cells w/ SGs	% in SGS		15	Image #	Total cells	Cells w/ SGs	% in SGS
Frame 1	7	40	8			Frame 1	7	49	14			Frame 1	7	19	6
Frame 2	8	36	16			Frame 2	8	26	9			Frame 2	8	34	15
Frame 3	9	36	12	32.1429		Frame 3	9	30	13	34.2857		Frame 3	9	35	10	35.2273
30	Image #	Total cells	Cells w/ SGs	% in SGS		30	Image #	Total cells	Cells w/ SGs	% in SGS		30	Image #	Total cells	Cells w/ SGs	% in SGS
Frame 1	10	42	8			Frame 1	13	47	8			Frame 1	10	44	10
Frame 2	11	45	5			Frame 2	14	66	11			Frame 2	11	43	11
Frame 3	12	30	10	19.6581		Frame 3	15	14	3	17.3228		Frame 3	12	30	11	27.3504
60	Image #	Total cells	Cells w/ SGs	% in SGS		60	Image #	Total cells	Cells w/ SGs	% in SGS		60	Image #	Total cells	Cells w/ SGs	% in SGS
Frame 1	13	51	2			Frame 1	10	23	1			Frame 1	13	46	0
Frame 2	14	58	2			Frame 2	11	34	1			Frame 2	14	26	1
Frame 3	15	33	1	3.52113		Frame 3	12	25	0	2.43902		Frame 3	15	35	0	0.934579

## Sheet: Figure 3C
(rep 1)
AsDMSO	Total cells	Cells w/ SGs	Average
1	51	51
2	40	39	98.9011
DTT_DMSO	Total cells	Cells w/ SGs	Average
1	40	38
2	47	42	91.954
HF_DMSO	Total cells	Cells w/ SGs	Average
1	30	8
2	41	11	26.7606
HFpuro_DMSO	Total cells	Cells w/ SGs	Average
1	37	23
2	48	30	62.3529
AsISRIB	Total cells	Cells w/ SGs	Average
1	51	20
2	55	19	36.7925
DTT_ISRIB	Total cells	Cells w/ SGs	Average
1	43	0
2	57	1	1
HF_ISRIB	Total cells	Cells w/ SGs	Average
1	41	2
2	46	0	2.29885
HFpuro_ISRIB	Total cells	Cells w/ SGs	Average
1	50	15
2	49	8	23.2323
Rep 2
AsDMSO	Total cells	Cells w/ SGs	Average
1	50	49
2	43	43	98.9247
DTT_DMSO	Total cells	Cells w/ SGs	Average
1	35	35
2	65	62	97
HF_DMSO	Total cells	Cells w/ SGs	Average
1	66	15
2	36	8	22.549
HFpuro_DMSO	Total cells	Cells w/ SGs	Average
1	43	27
2	48	28	60.4396
AsISRIB	Total cells	Cells w/ SGs	Average
1	49	35
2	47	23	60.4167
DTT_ISRIB	Total cells	Cells w/ SGs	Average
1	49	0
2	45	1	1.06383
HF_ISRIB	Total cells	Cells w/ SGs	Average
1	49	1
2	40	1	2.24719
HFpuro_ISRIB	Total cells	Cells w/ SGs	Average
1	39	14
2	43	19	40.2439
Rep 3
AsDMSO	Total cells	Cells w/ SGs	Average
1	40	40
2	46	45	98.8372
DTT_DMSO			Average
1	48	48
2	46	46	100
HF_DMSO			Average
1	52	21
2	32	16	44.0476
HFpuro_DMSO			Average
1	42	28
2	47	23	57.3034
AsISRIB			Average
1	38	22
2	34	18	55.5556
DTT_ISRIB			Average
1	39	0
2	39	1	1.28205
HF_ISRIB			Average
1	31	0
2	43	1	1.35135
HFpuro_ISRIB			Average
1	53	24
2	59	24	42.8571

## Sheet: Figure 3D
	DMSO	HF	HF+GCN2iB
Rep 1	1.00002	8.34247	1.77481
Rep 2	0.999977	10.5887	2.36975
Rep 3	1.00001	12.514	2.45339

## Sheet: Figure 3E
Rep 1	Frame	Cells Total	Cells w/ SGs
HF	1	41	21
	2	36	16	48.0519
HF+puro	1	46	44
	2	45	42	94.5055
HF+iB	1	48	1
	2	48	2	3.125
HF+both	1	59	4
	2	53	4	7.14286
Rep 2	Frame	Cells Total	Cells w/ SGs
HF	1	46	26
	2	44	23	54.4444
HF+puro	1	37	36
	2	46	43	95.1807
HF+iB	1	27	0
	2	45	0	0
HF+both	1	53	5
	2	39	4	9.78261
Rep 3	Frame	Cells Total	Cells w/ SGs	% w/ SGs
HF	1	31	15
	2	49	20	43.75
HF+puro	1	48	44
	2	61	58	93.578
HF+iB	1	39	3
	2	47	1	4.65116
HF+both	1	42	3
	2	54	2	5.20833

## Sheet: Figure 4A
Frame #	Treatment	# Cells	# w/ SGs	% w/ SGs
1	WT As	85	85
2		71	71	100
1	WT Tg	67	67
2		114	113	99.4475
1	WT HF	75	33
2		69	18	35.4167
1	WT HF Puro	49	49
2		129	129	100
1	KO As	73	0
2		62	1	0.740741
1	KO Tg	69	1
2		83	0	0.657895
1	KO HF	79	1
2		80	0	0.628931
1	KO HF Puro	77	0
2		103	0	0
Frame #	Treatment	# Cells	# w/ SGs	% w/ SGs
1	WT As	58	56
2		56	53	95.614
1	WT Tg	48	45
2		60	58	95.3704
1	WT HF	55	12
2		51	11	21.6981
1	WT HF Puro	53	50
2		48	46	95.0495
1	KO As	42	1
2		76	0	0.847458
1	KO Tg	73	0
2		60	0	0
1	KO HF	49	0
2		38	0	0
1	KO HF Puro	62	0
2		39	0	0
Frame #	Treatment	# Cells	# w/ SGs	% w/ SGs
1	WT As	45	45
2		51	50	98.9583
1	WT Tg	58	57
2		55	53	97.3451
1	WT HF	51	12
2		49	13	25
1	WT HF Puro	50	49
2		52	52	99.0196
1	KO As	62	2
2		66	0	1.5625
1	KO Tg	57	0
2		63	0	0
1	KO HF	50	0
2		56	0	0
1	KO HF Puro	46	0
2		40	0	0

## Sheet: Figure 5A
HF	HF+Puro	As	As+Puro	Tg	Tg+Puro
1.74	2.87	1.92	4.55	2.46	2.18
1.92	2.82	2.06	3.21	2.11	2.74
1.85	2.48	2.63	3.55	1.49	3.97
2.85	2.51	1.63	2.75	3.25	3.16
2.73	3.69	2.78	3.51	3.19	2.07
1.94	2.12	1.77	2.62	2.23	1.82
2.22	2.46	2.27	2.93	4.05	2.56
2.06	2.75	1.65	2.1	2.62	2.88
2.13	2.44	2.25	2.59	1.81	2.92
1.28	3.4	2.44	2.14	1.89	2.8
1.57	3.03	1.64	2.21	3.44	1.67
1.35	3.17	2.91	3.02	1.59	3.08
1.55	3.02	1.66	2.72	3.28	2.27
2.02	2.67	1.98	2.74	1.69	2.01
2.42	2.75	2.26	2.8	1.91	1.7
2.25	2.93	1.79	2.12	2.75	2.27
2.27	2.79	1.38	2.86	2.46	2.69
2.11	2.16	1.97	3.12	1.43	3.11
1.94	2.35	1.63	1.78	2.32	2.43
2.2	2.32	1.43	2.22	1.41	2.14
2.31	1.77	2.05	4.37	1.77	2.75
1.94	2.15	2.91	3.62	1.71	2.48
1.81	2.05	1.85	2.25	3.04	2.72
1.73	1.95	3.53	3.14	1.65	3.57
2.36	2.21	1.92	3.13	2.13	1.86
1.49	2.43	2	3.11	1.88	2.65
1.77	2.01	2.08	1.98	2.04	2.25
1.56	1.45	2.32	2.08	2.98	5.22
2.31	2.01	1.66	3.64	1.8	2.61
2.04	1.89	2.07	1.83	2.9	2.29
1.65	2.15	1.48	2.01	1.91	2.38
2.14	2.58	2.69	1.71	2.47	2.14
1.44	1.87	2.65	2.49	2.85	3.67
1.58	2.13	3.38	3.29	1.73	2.67
1.43	1.78	3.88	1.55	1.75	2.73
2.07	1.9	1.89	2.11	2.48	3.14
1.44	2.3	2.4	2.24	3.38	2.6
2.07	2.1	1.79	1.87	1.4	2.55
1.39	2.15	2.28	2.39	3.17	1.63
1.36	2.12	3.13	1.8	1.08	3.17
2.32	2.55	2.96	2.49	2.07	3.45
2.08	2.65	4.65	3.55	2.95	4.41
1.93	2.76	2.09	2.06	1.56	2.77
1.73	2.08	2.6	2.74	2.2	1.96
1.66	2.58	1.77	3.11	2.46	4.15
1.48	2.18	2.88	3.68	2.2	3
1.66	1.51	2.09	1.97	2.01	4.75
2.07	1.44	1.29	2.88	2.14	2.91
2.07	1.75	2.27	1.74	1.96	4.57
2.12	1.79	2.98	2.26	3.25	4.07
2.07	2.64	1.44	2.48	1.9	2.22
1.95	3.12	1.6	2.54	1.86	1.98
2.78	2.39	1.64	2.79	1.83	3.18
2.21	2.21	2.01	3.22	1.59	4.04
1.71	2.02	1.64	1.74	1.67	1.82
1.36	4.3	1.49	2.93	1.66	3.8
1.93	1.76	1.63	1.95	1.66	2.86
1.69	1.56	3.1	2.65	2.36	2.32
1.3	1.26	2.19	1.8	2.43	2.19
1.47	1.35	1.54	3.35	2.93	3.29

## Sheet: Figure 5B
HF	HF+Puro	As	As+Puro	Tg	Tg+Puro
2.43	4.19	4.05	8.49	4.26	4.43
3.62	4.01	4.11	8.02	4.08	5.17
3.39	3.44	5.39	7.51	2.34	6.9
4.09	3.51	2.84	4.77	5.72	7.45
4.42	5.8	5.75	7.71	6.22	2.85
2.19	3.21	2.88	4.72	4.65	2.92
3.95	5.13	5.9	6.62	8.49	5.67
2.65	4.17	2.36	4.15	7.66	7.73
2.91	4.22	3.66	5.58	3.02	9.2
2.01	5.18	4.71	4.08	3.27	5.11
2.19	4.1	2.66	4.74	6.91	2.91
2.06	4.08	6.05	6.26	2.13	6.4
2.18	4.5	2.72	5.47	7.43	3.88
3.19	4.07	3.99	5.36	3.13	4.51
4.2	3.74	5.07	5.8	3.27	3.04
3.36	4.3	2.89	3.41	7.31	4.36
3.83	3.37	2.39	5.18	5.33	6.85
2.97	3.17	3.19	8.84	1.64	6.14
3.67	3.05	3.04	3.5	3.62	5.21
3.92	2.45	2.08	3.97	2.56	4.16
4.13	4.19	4.72	8.5	2.54	5.64
3.83	4.01	6.78	7.02	3.18	4.24
3.28	3.44	2.93	4.86	5.86	4.35
3.28	3.51	6.43	6.18	2.14	7.87
4.35	5.8	2.98	5.69	4.16	3.01
2.65	3.21	3.94	6.16	3.69	5.3
3.05	5.13	3.22	4.37	3.5	4.13
2.34	4.17	3.96	4.37	6.1	9.7
4.06	4.22	2.57	8.01	3.09	5.29
3.47	5.18	3.95	2.96	5.31	4.33
3.1	4.1	2.44	4.02	3.11	4.63
3.35	4.08	4.73	3.63	4.4	3.81
3.75	4.5	4.67	4.73	5.7	7.63
2.56	4.07	7.56	6.29	2.93	6.61
4.04	3.74	6.94	2.88	3.66	5.67
4.7	4.3	3.23	4.68	5.28	7.73
2.64	3.37	5.12	5.02	6.85	6.39
4.4	3.17	3.14	3.09	2.17	5.25
2.07	3.05	3.96	5.19	6.12	3.76
2.3	2.45	8.17	4.33	1.62	8.24
4.2	4.75	4.47	4.72	3.73	5.03
4.19	4.32	6.6	6.08	3.94	5.94
3.21	4.69	3.8	3.26	2.32	4.16
3.28	3.29	3.07	5.82	3.39	3.25
1.95	4.06	2.67	4.9	2.89	5.71
2.52	4.99	3.99	6.04	5.31	4.84
2.51	4.61	3.43	3.22	3.13	7.48
4.7	2.99	2.31	3.91	4.27	5.36
3.93	3.02	3.71	2.54	3.47	6.37
3.95	2.65	4.67	4.28	5.84	7.18
4.15	4.89	2.03	4.16	2.8	6.27
4.31	6.9	3.12	5.12	3.26	2.38
4.88	4.15	2.05	4.45	2.52	3.93
4.24	3.73	3.28	6.31	3.57	5.45
2.96	3.57	3.61	3.25	3.1	2.53
2.69	3.08	2.87	3.7	2.61	5.58
3.39	3.36	2.58	3.44	2.46	4.87
2.94	2.62	4.05	4.57	3.79	3.4
1.93	2.39	3.66	3.05	4.07	4.36
2.52	2.05	1.85	4.55	5.09	4.58

[truncated: 5 more sheets: Figure 5C, Figure 5D, Figure 5E, Figure 6, Figure S1]
